# Supplementary material
Source: PubMed Central journal article supplement (PMC9134044)

## Supplemental Online Content

Shoucair S, Chen J, Martinson JR, et al. Association of matrix metalloproteinase 7 expression with pathologic response after neoadjuvant treatment in patients with resected pancreatic ductal adenocarcinoma. *JAMA Surg*. Published online May 25, 2022. doi:10.1001/jamasurg.2022.1362

### eMethods.

**eTable 1.** Demographics and Tumor Characteristics of FNA Specimens in Initial (Discovery) Cohort Prior to Neoadjuvant Therapy (n = 23)

**eTable 2.** Targeted RNAseq NGS List (N = 472)

**eTable 3.** Univariable and Multivariable Logistic Regression Analyzing the Association of Preoperative Demographic and Clinical Factors With Favorable PR (Score 0 or 1) Showing That MMP-7 Expression Profile on FNA Specimens Prior to Neoadjuvant Therapy Is an Independent Predictor of PR

**eTable 4.** Demographics and Tumor Characteristics of FFPE Surgical Specimens in Chemotherapy-Naïve Cohort (n = 60)

**eTable 5.** Area Under Curve (AUC) Obtained from ROC Curves (eFigure 2) Based on Multivariable Regression Modelling With and Without MMP-7 After Stratification by Resectability Status at the Time of Diagnosis Showing Role of MMP-7 Protein Expression Profile on FNA Specimens in Predicting Favorable PR

**eTable 6.** Univariable and Multivariable Cox Regression (Backward-Entry Method) on FFPE Surgical Specimens in Exploratory (Chemotherapy-Naïve) Cohort

**eFigure 1.** IHC Staining of Tissue Biopsy Prior to Neoadjuvant Therapy (Validation Cohort) Representing Negative (A) and Positive (B) MMP-7 Protein Expression; IHC Staining of Primary Tumor Surgical Specimens from Chemotherapy-Naïve Cohort (Exploratory Cohort) Showing Negative (C) and Positive (D) MMP-7 Protein Expression

**eFigure 2.** ROC Curves Based on Multivariable Regression Modelling With and Without MMP-7 After Stratification by Resectability Status at the Time of Diagnosis Showing Role of MMP-7 Protein Expression Profile on FNA Specimens in Predicting Favorable PR

**eFigure 3.** Kaplan-Meier Overall Survival and Recurrence-Free Survival Curves Comparing MMP-7 Positive and Negative Expression in FNA Specimens From Cohort Undergoing Neoadjuvant Therapy (A, B) and FFPE Surgical Specimens From Chemotherapy-Naïve Cohort (C, D)

This supplemental material has been provided by the authors to give readers additional information about their work.

## eMethods

### *Study population and tissue specimens*

An exploratory cohort of 60 patients who underwent upfront surgical resection (without any neoadjuvant therapy) was investigated to evaluate the association of MMP-7 protein expression in primary tumor surgical specimens with oncologic outcomes. For this purpose, archived surgical resected primary tumor specimen FFPE blocks were obtained and IHC staining for MMP-7 protein expression was performed.

By CAP score criteria, a score of 0 was assigned for pathologic complete response (pCR), score 1 (near-complete PR), score 2 (partial response) and score 3 (poor or no response).

### *DNA/RNA extraction and sequencing*

Bulk FNA specimens were processed for downstream sequencing per the protocol described in our previous study.<sup>19</sup> Briefly, DNA/RNA were extracted using the QIAamp AllPrep DNA/RNA Micro Kit (Cat No: 80284, Qiagen, Dusseldorf, Germany) and then quantified by Qubit DNA/RNA Assay Kit (Thermo Fisher Scientific, Waltham, MA) in Qubit 3.0 Fluorometer.

All next-generation sequencing assays were performed by investigators that were blinded to patient information. Bulk FNA samples containing sufficient tumor cells were confirmed by a DNA sequencing with an Ion AmpliSeq Custom Panel (Thermo Fisher) covering *KRAS*, *GNAS*, *TP53*, *SMAD4*, and *CDKN2A*. A targeted RNAseq Custom Panel (**Table S2**) covering *MMP-7* and an additional 1471 genes was performed using the Ion GeneStudio™ S5 System (Thermo Fisher Scientific, Waltham, MA), according to the manufacturer's protocols and our previous studies.<sup>19,20</sup>

### *Immunohistochemistry staining*

FFPE Tissue blocks were sectioned into 5 µm thick slides. De-paraffinization with heat and xylene, followed by immersion in alcohol for re-hydration. Endogenous peroxidase activity was suppressed by a solution of 3% hydrogen peroxide in methanol for 30 minutes. Antigen retrieval was performed using ethylenediamine tetraacetic acid (EDTA) antigen retrieval buffer (pH 8.5, 1.0x) microwaved at 750W and 350W for 10 and 15 minutes, respectively. Primary anti-MMP-7 antibody (Cell Signaling Technology Cat# 3801, RRID:AB\_2144465) was added (dilution 1:50) and incubated overnight at 4°C. After washing, the slides were treated with biotinylated anti-rabbit secondary antibody for 30 minutes. The slides were finally developed using AEC chromogen substrate kit. The slides were reviewed on a blinded basis by two independent investigators. The categories of immunohistochemical staining were assigned as negative in cases where < 10% of tumor cells were stained and as a positive result when >10% of tumor cells were stained.

**eTable 1. Demographics and tumor characteristics of FNA specimens in initial (discovery) cohort prior to neoadjuvant therapy (N = 23).**

| Variables, N (%)                | Discovery cohort<br>(N = 23) | Validation cohort<br>(N = 80) | P            |
|---------------------------------|------------------------------|-------------------------------|--------------|
| Age (years) Median (IQR)        | 64.5 (59, 69)                | 66.3 (58.6, 72.9)             |              |
| Sex                             |                              |                               | 0.52         |
| Female                          | 11 (47.9)                    | 40 (50.0)                     |              |
| Male                            | 12 (52.1)                    | 40 (50.0)                     |              |
| Race (White)                    | 20 (86.9%)                   | 71 (88.7)                     | 0.45         |
| Baseline Ca19-9, Median (IQR)   | 315.8 (166.4, 1383.3)        | 182.2 (20.5, 535.2)           | 0.32         |
| Type of neoadjuvant             |                              |                               | 0.12         |
| 5-FU based                      | 10 (43.5)                    | 57 (71.3)                     |              |
| Gem-based                       | 5 (21.7)                     | 17 (21.3)                     |              |
| Other                           | 8 (34.8)                     | 6 (7.5)                       |              |
| Chemo-Radiation                 | 13 (56.5)                    | 59 (73.8)                     | 0.13         |
| Chemotherapy alone              | 10 (43.5)                    | 21 (26.3)                     |              |
| pT-stage ≥ T3                   | 8 (34.8)                     | 23 (28.7)                     | 0.38         |
| pN-stage ≥ N1                   | 13 (56.5)                    | 31 (38.8)                     | 0.10         |
| Grade of differentiation        |                              |                               | 0.93         |
| Well                            | 2 (8.6)                      | 6 (7.5)                       |              |
| Moderate                        | 15 (65.2)                    | 50 (62.5)                     |              |
| Poor                            | 6 (26.2)                     | 24 (30)                       |              |
| Lymphovascular Invasion         | 9 (39.1)                     | 20 (25)                       | 0.14         |
| Perineural Invasion             | 17 (73.9)                    | 44 (55)                       | 0.08         |
| Margin Class (R0)               | 19 (82.6)                    | 71 (88.7)                     | 0.32         |
| Pathologic Response (CAP Score) |                              |                               | <b>0.008</b> |
| 0                               | 0(0)                         | 8 (10)                        |              |
| 1                               | 3 (13)                       | 34 (42.5)                     |              |
| 2                               | 5 (21.7)                     | 13 (16.2)                     |              |
| 3                               | 15 (65.2)                    | 25 (31.2)                     |              |
| Resectability                   |                              |                               | 0.24         |
| Resectable                      | 9 (39.1)                     | 21 (26.3)                     |              |
| Borderline resectable           | 5 (21.7)                     | 32 (40)                       |              |
| Locally advanced                | 9 (39.1)                     | 27 (33.8)                     |              |

IQR, Interquartile range

**eTable 2: Targeted RNA NGS list (N=472).**

| ID           | Target Region Start | Target Region End | AmpliSeqID   | Gene   | AmpliSeq Version | Workflow |
|--------------|---------------------|-------------------|--------------|--------|------------------|----------|
| NM_004302    | 1323                | 1425              | AMPL27122439 | ACVR1B | 6.0              | RNAseq   |
| NM_001616    | 206                 | 308               | AMPL11796878 | ACVR2A | 6.0              | RNAseq   |
| NM_001077401 | 1349                | 1457              | AMPL3042073  | ACVRL1 | 6.0              | RNAseq   |
| NM_001110    | 466                 | 572               | AMPL5356454  | ADAM10 | 6.0              | RNAseq   |
| NM_003183    | 2037                | 2142              | AMPL9492210  | ADAM17 | 6.0              | RNAseq   |
| NM_001115    | 1592                | 1699              | AMPL1610329  | ADCY8  | 6.0              | RNAseq   |
| NM_001353    | 176                 | 286               | AMPL9888159  | AKR1C1 | 6.0              | RNAseq   |
| NM_205845    | 463                 | 571               | AMPL22530899 | AKR1C2 | 6.0              | RNAseq   |
| NM_003739    | 231                 | 329               | AMPL9583583  | AKR1C3 | 6.0              | RNAseq   |
| NM_001818    | 48                  | 154               | AMPL7374404  | AKR1C4 | 6.0              | RNAseq   |
| NM_001014431 | 358                 | 467               | AMPL2201548  | AKT1   | 6.0              | RNAseq   |
| NM_001626    | 1043                | 1151              | AMPL11229610 | AKT2   | 6.0              | RNAseq   |
| NM_004304    | 3264                | 3373              | AMPL27472922 | ALK    | 6.0              | RNAseq   |
| NM_000699    | 162                 | 262               | AMPL5487990  | AMY2A  | 6.0              | RNAseq   |
| NM_181861    | 1015                | 1117              | AMPL21790783 | APAF1  | 6.0              | RNAseq   |
| NM_000038    | 1676                | 1781              | AMPL1716059  | APC    | 6.0              | RNAseq   |
| NM_001077628 | 796                 | 900               | AMPL1108511  | APH1A  | 6.0              | RNAseq   |
| NM_031301    | 144                 | 244               | AMPL15100366 | APH1B  | 6.0              | RNAseq   |
| NM_000044    | 2927                | 3032              | AMPL1447304  | AR     | 6.0              | RNAseq   |
| NM_006015    | 3744                | 3851              | AMPL28474827 | ARID1A | 6.0              | RNAseq   |
| NM_152641    | 4844                | 4944              | AMPL34284744 | ARID2  | 6.0              | RNAseq   |
| NM_138450    | 237                 | 345               | AMPL34675105 | ARL11  | 6.0              | RNAseq   |
| NM_152285    | 484                 | 589               | AMPL35508520 | ARRDC1 | 6.0              | RNAseq   |
| NM_000051    | 5631                | 5733              | AMPL2143252  | ATM    | 6.0              | RNAseq   |
| NM_001184    | 322                 | 429               | AMPL6698211  | ATR    | 6.0              | RNAseq   |
| NM_003600    | 1194                | 1297              | AMPL11289894 | AURKA  | 6.0              | RNAseq   |
| NM_032989    | 444                 | 548               | AMPL15908493 | BAD    | 6.0              | RNAseq   |
| NM_001704    | 3031                | 3134              | AMPL7540943  | BAI3   | 6.0              | RNAseq   |
| NM_004656    | 756                 | 862               | AMPL29370657 | BAP1   | 6.0              | RNAseq   |
| NM_000055    | 108                 | 210               | AMPL5334700  | BCHE   | 6.0              | RNAseq   |
| NM_000633    | 154                 | 251               | AMPL2837802  | BCL2   | 6.0              | RNAseq   |
| NM_138578    | 223                 | 332               | AMPL34227316 | BCL2L1 | 6.0              | RNAseq   |
| NM_021946    | 4299                | 4401              | AMPL36541905 | BCORL1 | 6.0              | RNAseq   |
| NM_004333    | 1411                | 1520              | AMPL28552085 | BRAF   | 6.0              | RNAseq   |
| NM_007300    | 4880                | 49853             | AMPL13649775 | BRCA1  | 6.0              | RNAseq   |

|              |      |      |              |         |     |        |
|--------------|------|------|--------------|---------|-----|--------|
| NM_000059    | 9817 | 9922 | AMPL6315908  | BRCA2   | 6.0 | RNAseq |
| NM_032043    | 719  | 823  | AMPL14267024 | BRIP1   | 6.0 | RNAseq |
| NM_004336    | 701  | 803  | AMPL29290680 | BUB1    | 6.0 | RNAseq |
| NM_004725    | 566  | 669  | AMPL27323746 | BUB3    | 6.0 | RNAseq |
| NM_021098    | 4018 | 4125 | AMPL35326025 | CACNA1H | 6.0 | RNAseq |
| NM_032977    | 396  | 502  | AMPL17568853 | CASP10  | 6.0 | RNAseq |
| NM_032991    | 679  | 783  | AMPL18385871 | CASP3   | 6.0 | RNAseq |
| NM_001226    | 673  | 778  | AMPL9136589  | CASP6   | 6.0 | RNAseq |
| NM_033338    | 644  | 738  | AMPL17730367 | CASP7   | 6.0 | RNAseq |
| NM_001080125 | 740  | 836  | AMPL5125235  | CASP8   | 6.0 | RNAseq |
| NM_001229    | 1337 | 1440 | AMPL8355632  | CASP9   | 6.0 | RNAseq |
| NM_001236    | 470  | 577  | AMPL9279705  | CBR3    | 6.0 | RNAseq |
| NM_003914    | 1596 | 1701 | AMPL28572122 | CCNA1   | 6.0 | RNAseq |
| NM_031966    | 1412 | 1518 | AMPL14157888 | CCNB1   | 6.0 | RNAseq |
| NM_053056    | 351  | 458  | AMPL16186640 | CCND1   | 6.0 | RNAseq |
| NM_001759    | 844  | 953  | AMPL11854004 | CCND2   | 6.0 | RNAseq |
| NM_001238    | 1004 | 1106 | AMPL7555808  | CCNE1   | 6.0 | RNAseq |
| NM_001785    | 279  | 388  | AMPL8437699  | CDA     | 6.0 | RNAseq |
| NM_001789    | 1201 | 1304 | AMPL7718089  | CDC25A  | 6.0 | RNAseq |
| NM_024529    | 1364 | 1468 | AMPL36259069 | CDC73   | 6.0 | RNAseq |
| NM_004360    | 1610 | 1714 | AMPL28185772 | CDH1    | 6.0 | RNAseq |
| NM_001786    | 241  | 344  | AMPL7721438  | CDK1    | 6.0 | RNAseq |
| NM_001798    | 930  | 1038 | AMPL11968322 | CDK2    | 6.0 | RNAseq |
| NM_000075    | 418  | 528  | AMPL4090056  | CDK4    | 6.0 | RNAseq |
| NM_001145306 | 1261 | 1365 | AMPL5549170  | CDK6    | 6.0 | RNAseq |
| NM_001260    | 1257 | 1362 | AMPL8999838  | CDK8    | 6.0 | RNAseq |
| NM_078467    | 421  | 530  | AMPL18336733 | CDKN1A  | 6.0 | RNAseq |
| NM_004064    | 928  | 1036 | AMPL30170055 | CDKN1B  | 6.0 | RNAseq |
| NM_000077    | 666  | 772  | AMPL4089136  | CDKN2A  | 6.0 | RNAseq |
| NM_004936    | 491  | 594  | AMPL18141488 | CDKN2B  | 6.0 | RNAseq |
| NM_078626    | 514  | 617  | AMPL16833223 | CDKN2C  | 6.0 | RNAseq |
| NM_001807    | 341  | 446  | AMPL8603667  | CEL     | 6.0 | RNAseq |
| NM_033440    | 219  | 326  | AMPL18166601 | CELA2A  | 6.0 | RNAseq |
| NM_005747    | 229  | 338  | AMPL29440374 | CELA3A  | 6.0 | RNAseq |
| NM_007352    | 452  | 559  | AMPL13122485 | CELA3B  | 6.0 | RNAseq |
| NM_000492    | 2544 | 2648 | AMPL6465189  | CFTR    | 6.0 | RNAseq |
| NM_001274    | 1159 | 1263 | AMPL7796632  | CHEK1   | 6.0 | RNAseq |
| NM_001005735 | 1537 | 1639 | AMPL2657479  | CHEK2   | 6.0 | RNAseq |
| NM_001278    | 1948 | 2055 | AMPL7797843  | CHUK    | 6.0 | RNAseq |

|              |       |       |              |         |     |        |
|--------------|-------|-------|--------------|---------|-----|--------|
| NM_004882    | 555   | 654   | AMPL28739194 | CIR1    | 6.0 | RNAseq |
| NM_007056    | 337   | 443   | AMPL12698021 | CLASRP  | 6.0 | RNAseq |
| NM_001832    | 177   | 283   | AMPL10530961 | CLPS    | 6.0 | RNAseq |
| NM_005140    | 358   | 463   | AMPL27862431 | CNGA2   | 6.0 | RNAseq |
| NM_080629    | 4681  | 4789  | AMPL17432958 | COL11A1 | 6.0 | RNAseq |
| NM_000093    | 5251  | 5355  | AMPL2831737  | COL5A1  | 6.0 | RNAseq |
| NM_004369    | 3277  | 3384  | AMPL27933904 | COL6A3  | 6.0 | RNAseq |
| NM_153264    | 7936  | 8038  | AMPL17060297 | COL6A5  | 6.0 | RNAseq |
| NM_001102608 | 5709  | 5816  | AMPL1545666  | COL6A6  | 6.0 | RNAseq |
| NM_001868    | 1010  | 1119  | AMPL10917633 | CPA1    | 6.0 | RNAseq |
| NM_015692    | 1861  | 1973  | AMPL33783463 | CPAMD8  | 6.0 | RNAseq |
| NM_001871    | 1080  | 1192  | AMPL8245762  | CPB1    | 6.0 | RNAseq |
| NM_000757    | 806   | 902   | AMPL4769976  | CSF1    | 6.0 | RNAseq |
| NM_005211    | 1961  | 2067  | AMPL27286436 | CSF1R   | 6.0 | RNAseq |
| NM_033225    | 10174 | 10280 | AMPL16512831 | CSMD1   | 6.0 | RNAseq |
| NM_052896    | 6282  | 6388  | AMPL15996854 | CSMD2   | 6.0 | RNAseq |
| NM_198123    | 862   | 968   | AMPL21626780 | CSMD3   | 6.0 | RNAseq |
| NM_001328    | 923   | 1032  | AMPL7974282  | CTBP1   | 6.0 | RNAseq |
| NM_022802    | 2746  | 2849  | AMPL34972921 | CTBP2   | 6.0 | RNAseq |
| NM_001906    | 19    | 118   | AMPL7364175  | CTRB1   | 6.0 | RNAseq |
| NM_001025200 | 211   | 315   | AMPL964867   | CTRB2   | 6.0 | RNAseq |
| NM_007272    | 307   | 411   | AMPL12504527 | CTRC    | 6.0 | RNAseq |
| NM_003592    | 2558  | 2664  | AMPL8209755  | CUL1    | 6.0 | RNAseq |
| NM_000634    | 56    | 156   | AMPL3400001  | CXCR1   | 6.0 | RNAseq |
| NM_001557    | 379   | 486   | AMPL11107598 | CXCR2   | 6.0 | RNAseq |
| NM_020311    | 96    | 204   | AMPL31908292 | CXCR7   | 6.0 | RNAseq |
| NM_148923    | 239   | 346   | AMPL34651448 | CYB5A   | 6.0 | RNAseq |
| NM_000781    | 579   | 686   | AMPL3192936  | CYP11A1 | 6.0 | RNAseq |
| NM_000497    | 591   | 701   | AMPL1428925  | CYP11B1 | 6.0 | RNAseq |
| NM_000498    | 864   | 973   | AMPL1673129  | CYP11B2 | 6.0 | RNAseq |
| NM_000102    | 593   | 694   | AMPL1382000  | CYP17A1 | 6.0 | RNAseq |
| NM_000103    | 1131  | 1237  | AMPL4602847  | CYP19A1 | 6.0 | RNAseq |
| NM_000500    | 687   | 788   | AMPL2620377  | CYP21A2 | 6.0 | RNAseq |
| NM_000106    | 1173  | 1281  | AMPL5936620  | CYP2D6  | 6.0 | RNAseq |
| NM_017460    | 391   | 491   | AMPL31771047 | CYP3A4  | 6.0 | RNAseq |
| NM_022820    | 1108  | 1209  | AMPL36782782 | CYP3A43 | 6.0 | RNAseq |
| NM_000777    | 200   | 291   | AMPL3569906  | CYP3A5  | 6.0 | RNAseq |
| NM_000765    | 1501  | 1600  | AMPL4295408  | CYP3A7  | 6.0 | RNAseq |
| NM_001343    | 2802  | 2906  | AMPL7260755  | DAB2    | 6.0 | RNAseq |

|              |       |       |              |          |     |        |
|--------------|-------|-------|--------------|----------|-----|--------|
| NM_000790    | 899   | 1001  | AMPL3751222  | DDC      | 6.0 | RNAseq |
| NM_004675    | 217   | 319   | AMPL27553848 | DIRAS3   | 6.0 | RNAseq |
| NM_007337    | 1415  | 1522  | AMPL12691995 | DLEC1    | 6.0 | RNAseq |
| NM_005618    | 431   | 539   | AMPL27827828 | DLL1     | 6.0 | RNAseq |
| NM_016941    | 1678  | 1787  | AMPL32704364 | DLL3     | 6.0 | RNAseq |
| NM_019074    | 2182  | 2281  | AMPL31396774 | DLL4     | 6.0 | RNAseq |
| NM_003777    | 4908  | 5011  | AMPL11272646 | DNAH11   | 6.0 | RNAseq |
| NM_001369    | 287   | 394   | AMPL7777818  | DNAH5    | 6.0 | RNAseq |
| NM_001372    | 11290 | 11393 | AMPL10593530 | DNAH9    | 6.0 | RNAseq |
| NM_001380    | 3787  | 3892  | AMPL11742501 | DOCK1    | 6.0 | RNAseq |
| NM_004946    | 4006  | 4118  | AMPL27535684 | DOCK2    | 6.0 | RNAseq |
| NM_004947    | 2323  | 2427  | AMPL27417255 | DOCK3    | 6.0 | RNAseq |
| NM_014705    | 5075  | 5181  | AMPL24723128 | DOCK4    | 6.0 | RNAseq |
| NM_024940    | 5011  | 5117  | AMPL13845021 | DOCK5    | 6.0 | RNAseq |
| NM_001383    | 293   | 400   | AMPL9168667  | DPH1     | 6.0 | RNAseq |
| NM_000110    | 419   | 519   | AMPL2093445  | DPYD     | 6.0 | RNAseq |
| NM_020693    | 2953  | 3056  | AMPL31003419 | DSCAML1  | 6.0 | RNAseq |
| NM_015548    | 3170  | 3272  | AMPL31722246 | DST      | 6.0 | RNAseq |
| NM_004416    | 582   | 686   | AMPL30097098 | DTX1     | 6.0 | RNAseq |
| NM_001102595 | 1895  | 2001  | AMPL1357097  | DTX2     | 6.0 | RNAseq |
| NM_178502    | 1056  | 1163  | AMPL15715094 | DTX3     | 6.0 | RNAseq |
| NM_138287    | 1960  | 2060  | AMPL16254296 | DTX3L    | 6.0 | RNAseq |
| NM_015177    | 463   | 573   | AMPL25368900 | DTX4     | 6.0 | RNAseq |
| NM_001130987 | 2983  | 3087  | AMPL2561700  | DYSF     | 6.0 | RNAseq |
| NM_005225    | 894   | 1004  | AMPL29253382 | E2F1     | 6.0 | RNAseq |
| NM_004091    | 1191  | 1296  | AMPL30036601 | E2F2     | 6.0 | RNAseq |
| NM_001949    | 1186  | 1292  | AMPL10340053 | E2F3     | 6.0 | RNAseq |
| NM_001950    | 148   | 256   | AMPL7531768  | E2F4     | 6.0 | RNAseq |
| NM_001951    | 627   | 735   | AMPL9976395  | E2F5     | 6.0 | RNAseq |
| NM_198256    | 601   | 706   | AMPL21241121 | E2F6     | 6.0 | RNAseq |
| NM_203394    | 532   | 639   | AMPL22268883 | E2F7     | 6.0 | RNAseq |
| NM_024680    | 1444  | 1547  | AMPL14009997 | E2F8     | 6.0 | RNAseq |
| NM_005228    | 438   | 543   | AMPL28541017 | EGFR     | 6.0 | RNAseq |
| NM_001130678 | 233   | 339   | AMPL4132220  | EIF4E    | 6.0 | RNAseq |
| NM_004095    | 305   | 409   | AMPL27717688 | EIF4EBP1 | 6.0 | RNAseq |
| NM_020390    | 439   | 542   | AMPL32456506 | EIF5A2   | 6.0 | RNAseq |
| NM_001127615 | 464   | 567   | AMPL4408658  | ENOX1    | 6.0 | RNAseq |
| NM_182314    | 889   | 994   | AMPL21591023 | ENOX2    | 6.0 | RNAseq |
| NM_001429    | 4967  | 5071  | AMPL7241858  | EP300    | 6.0 | RNAseq |



|              |       |       |              |        |     |        |
|--------------|-------|-------|--------------|--------|-----|--------|
| NM_025209    | 577   | 684   | AMPL13895048 | EPC1   | 6.0 | RNAseq |
| NM_004439    | 2845  | 2949  | AMPL28063841 | EPHA5  | 6.0 | RNAseq |
| NM_004448    | 1532  | 1637  | AMPL28173828 | ERBB2  | 6.0 | RNAseq |
| NM_001982    | 413   | 521   | AMPL11448617 | ERBB3  | 6.0 | RNAseq |
| NM_005235    | 229   | 336   | AMPL27284273 | ERBB4  | 6.0 | RNAseq |
| NM_202001    | 190   | 295   | AMPL21410533 | ERCC1  | 6.0 | RNAseq |
| NM_000400    | 96    | 201   | AMPL2905825  | ERCC2  | 6.0 | RNAseq |
| NM_005236    | 2016  | 2118  | AMPL28737581 | ERCC4  | 6.0 | RNAseq |
| NM_004456    | 781   | 884   | AMPL27926041 | EZH2   | 6.0 | RNAseq |
| NM_000135    | 502   | 608   | AMPL4937401  | FANCA  | 6.0 | RNAseq |
| NM_000136    | 1368  | 1475  | AMPL1843962  | FANCC  | 6.0 | RNAseq |
| NM_022725    | 757   | 865   | AMPL37319244 | FANCF  | 6.0 | RNAseq |
| NM_004629    | 1314  | 1421  | AMPL28022492 | FANCG  | 6.0 | RNAseq |
| NM_000043    | 301   | 410   | AMPL6420985  | FAS    | 6.0 | RNAseq |
| NM_005245    | 3793  | 3891  | AMPL27071211 | FAT1   | 6.0 | RNAseq |
| NM_001447    | 10481 | 10591 | AMPL10043234 | FAT2   | 6.0 | RNAseq |
| NM_001008781 | 3542  | 3648  | AMPL919279   | FAT3   | 6.0 | RNAseq |
| NM_024582    | 5169  | 5275  | AMPL15455383 | FAT4   | 6.0 | RNAseq |
| NM_033632    | 1523  | 1625  | AMPL16316797 | FBXW7  | 6.0 | RNAseq |
| NM_000569    | 575   | 682   | AMPL3610335  | FCGR3A | 6.0 | RNAseq |
| NM_000800    | 696   | 804   | AMPL5789556  | FGF1   | 6.0 | RNAseq |
| NM_001174067 | 1138  | 1246  | AMPL8453388  | FGFR1  | 6.0 | RNAseq |
| NM_022970    | 2682  | 2789  | AMPL36377917 | FGFR2  | 6.0 | RNAseq |
| NM_001163213 | 1884  | 1987  | AMPL10721356 | FGFR3  | 6.0 | RNAseq |
| NM_002016    | 157   | 253   | AMPL8411679  | FLG    | 6.0 | RNAseq |
| NM_004119    | 2108  | 2209  | AMPL27128024 | FLT3   | 6.0 | RNAseq |
| NM_016725    | 288   | 397   | AMPL31000380 | FOLR1  | 6.0 | RNAseq |
| NM_000804    | 324   | 425   | AMPL4063208  | FOLR3  | 6.0 | RNAseq |
| NM_001199206 | 289   | 396   | AMPL9002590  | FOLR4  | 6.0 | RNAseq |
| NM_004496    | 197   | 306   | AMPL29995295 | FOXA1  | 6.0 | RNAseq |
| NM_002015    | 976   | 1081  | AMPL8755973  | FOXO1  | 6.0 | RNAseq |
| NM_001455    | 884   | 992   | AMPL9536179  | FOXO3  | 6.0 | RNAseq |
| NM_005269    | 552   | 662   | AMPL27734562 | GLI1   | 6.0 | RNAseq |
| NM_002067    | 561   | 669   | AMPL7673320  | GNA11  | 6.0 | RNAseq |
| NM_002072    | 867   | 975   | AMPL11684262 | GNAQ   | 6.0 | RNAseq |
| NM_032119    | 18230 | 18334 | AMPL15359727 | GPR98  | 6.0 | RNAseq |
| NM_002093    | 2159  | 2263  | AMPL7670984  | GSK3B  | 6.0 | RNAseq |
| NM_000852    | 559   | 666   | AMPL4426508  | GSTP1  | 6.0 | RNAseq |
| NM_002104    | 178   | 286   | AMPL9245840  | GZMK   | 6.0 | RNAseq |

|              |      |      |              |          |     |        |
|--------------|------|------|--------------|----------|-----|--------|
| NM_004964    | 169  | 271  | AMPL27170842 | HDAC1    | 6.0 | RNAseq |
| NM_001527    | 1230 | 1331 | AMPL11601143 | HDAC2    | 6.0 | RNAseq |
| NM_005524    | 469  | 578  | AMPL27714869 | HES1     | 6.0 | RNAseq |
| NM_032580    | 107  | 199  | AMPL18502798 | HES7     | 6.0 | RNAseq |
| NM_012259    | 386  | 492  | AMPL12272409 | HEY2     | 6.0 | RNAseq |
| NM_014571    | 304  | 410  | AMPL25840637 | HEYL     | 6.0 | RNAseq |
| NM_001530    | 1337 | 1439 | AMPL8472036  | HIF1A    | 6.0 | RNAseq |
| NM_002127    | 483  | 585  | AMPL8216930  | HLA-G    | 6.0 | RNAseq |
| NM_031935    | 6055 | 6162 | AMPL14102879 | HMCN1    | 6.0 | RNAseq |
| NM_000545    | 489  | 597  | AMPL2323015  | HNF1A    | 6.0 | RNAseq |
| NM_001130442 | 214  | 321  | AMPL1124340  | HRAS     | 6.0 | RNAseq |
| NM_000413    | 1063 | 1167 | AMPL4345976  | HSD17B1  | 6.0 | RNAseq |
| NM_004493    | 335  | 445  | AMPL27578526 | HSD17B10 | 6.0 | RNAseq |
| NM_016245    | 355  | 468  | AMPL32947097 | HSD17B11 | 6.0 | RNAseq |
| NM_178135    | 449  | 550  | AMPL16810933 | HSD17B13 | 6.0 | RNAseq |
| NM_016246    | 861  | 970  | AMPL33528637 | HSD17B14 | 6.0 | RNAseq |
| NM_002153    | 614  | 713  | AMPL11677126 | HSD17B2  | 6.0 | RNAseq |
| NM_000197    | 349  | 457  | AMPL3348088  | HSD17B3  | 6.0 | RNAseq |
| NM_000414    | 664  | 770  | AMPL2905253  | HSD17B4  | 6.0 | RNAseq |
| NM_003725    | 410  | 518  | AMPL7693179  | HSD17B6  | 6.0 | RNAseq |
| NM_016371    | 770  | 870  | AMPL30919304 | HSD17B7  | 6.0 | RNAseq |
| NM_000862    | 26   | 132  | AMPL2793468  | HSD3B1   | 6.0 | RNAseq |
| NM_000198    | 425  | 529  | AMPL4724632  | HSD3B2   | 6.0 | RNAseq |
| NM_025193    | 385  | 495  | AMPL14898030 | HSD3B7   | 6.0 | RNAseq |
| NM_005529    | 8027 | 8137 | AMPL28063196 | HSPG2    | 6.0 | RNAseq |
| NM_005896    | 297  | 402  | AMPL27566624 | IDH1     | 6.0 | RNAseq |
| NM_002168    | 720  | 825  | AMPL11892986 | IDH2     | 6.0 | RNAseq |
| NM_001111285 | 417  | 518  | AMPL5838528  | IGF1     | 6.0 | RNAseq |
| NM_000875    | 1229 | 1338 | AMPL1833765  | IGF1R    | 6.0 | RNAseq |
| NM_000584    | 197  | 302  | AMPL5817994  | IL8      | 6.0 | RNAseq |
| NM_176877    | 5179 | 5285 | AMPL15901678 | INADL    | 6.0 | RNAseq |
| NM_031483    | 2503 | 2605 | AMPL15095512 | ITCH     | 6.0 | RNAseq |
| NM_002210    | 1694 | 1802 | AMPL8031875  | ITGAV    | 6.0 | RNAseq |
| NM_000212    | 749  | 853  | AMPL3868029  | ITGB3    | 6.0 | RNAseq |
| NM_000214    | 2156 | 2264 | AMPL1544343  | JAG1     | 6.0 | RNAseq |
| NM_145159    | 2837 | 2939 | AMPL36559008 | JAG2     | 6.0 | RNAseq |
| NM_002227    | 3417 | 3519 | AMPL8376933  | JAK1     | 6.0 | RNAseq |
| NM_004972    | 2772 | 2871 | AMPL29237409 | JAK2     | 6.0 | RNAseq |
| NM_000215    | 316  | 426  | AMPL2020493  | JAK3     | 6.0 | RNAseq |

|              |      |      |              |          |     |        |
|--------------|------|------|--------------|----------|-----|--------|
| NM_001042603 | 1224 | 1327 | AMPL1122415  | KDM5A    | 6.0 | RNAseq |
| NM_021140    | 1828 | 1934 | AMPL37400297 | KDM6A    | 6.0 | RNAseq |
| NM_002253    | 1485 | 1586 | AMPL7318204  | KDR      | 6.0 | RNAseq |
| NM_014774    | 2196 | 2299 | AMPL26332646 | KIAA0494 | 6.0 | RNAseq |
| NM_000222    | 1122 | 1229 | AMPL5414183  | KIT      | 6.0 | RNAseq |
| NM_033360    | 395  | 496  | AMPL16322052 | KRAS     | 6.0 | RNAseq |
| NM_005559    | 5419 | 5520 | AMPL28378784 | LAMA1    | 6.0 | RNAseq |
| NM_001040167 | 772  | 883  | AMPL4591694  | LFNG     | 6.0 | RNAseq |
| NM_002317    | 1169 | 1274 | AMPL8366296  | LOX      | 6.0 | RNAseq |
| NM_018557    | 6516 | 6619 | AMPL30817456 | LRP1B    | 6.0 | RNAseq |
| NM_014757    | 2260 | 2367 | AMPL26244940 | MAML1    | 6.0 | RNAseq |
| NM_032427    | 3688 | 3789 | AMPL15506417 | MAML2    | 6.0 | RNAseq |
| NM_018717    | 3124 | 3231 | AMPL30578808 | MAML3    | 6.0 | RNAseq |
| NM_002374    | 425  | 533  | AMPL10103073 | MAP2     | 6.0 | RNAseq |
| NM_002755    | 666  | 773  | AMPL10018074 | MAP2K1   | 6.0 | RNAseq |
| NM_030662    | 856  | 966  | AMPL14285263 | MAP2K2   | 6.0 | RNAseq |
| NM_145109    | 856  | 965  | AMPL36474922 | MAP2K3   | 6.0 | RNAseq |
| NM_003010    | 406  | 508  | AMPL9798196  | MAP2K4   | 6.0 | RNAseq |
| NM_145160    | 866  | 948  | AMPL35261487 | MAP2K5   | 6.0 | RNAseq |
| NM_005921    | 4584 | 4692 | AMPL27448342 | MAP3K1   | 6.0 | RNAseq |
| NM_006609    | 1065 | 1168 | AMPL12148967 | MAP3K2   | 6.0 | RNAseq |
| NM_002401    | 1459 | 1567 | AMPL7474677  | MAP3K3   | 6.0 | RNAseq |
| NM_005922    | 1753 | 1859 | AMPL28602471 | MAP3K4   | 6.0 | RNAseq |
| NM_005923    | 804  | 908  | AMPL27107895 | MAP3K5   | 6.0 | RNAseq |
| NM_002745    | 1177 | 1285 | AMPL8508553  | MAPK1    | 6.0 | RNAseq |
| NM_002969    | 321  | 428  | AMPL11232233 | MAPK12   | 6.0 | RNAseq |
| NM_139012    | 641  | 749  | AMPL36223989 | MAPK14   | 6.0 | RNAseq |
| NM_002746    | 1203 | 1310 | AMPL7175442  | MAPK3    | 6.0 | RNAseq |
| NM_002747    | 1635 | 1737 | AMPL9034720  | MAPK4    | 6.0 | RNAseq |
| NM_002748    | 1788 | 1887 | AMPL9842890  | MAPK6    | 6.0 | RNAseq |
| NM_002749    | 2445 | 2547 | AMPL8508709  | MAPK7    | 6.0 | RNAseq |
| NM_139049    | 876  | 980  | AMPL35770984 | MAPK8    | 6.0 | RNAseq |
| NM_002752    | 324  | 429  | AMPL10492065 | MAPK9    | 6.0 | RNAseq |
| NM_001039469 | 1415 | 1523 | AMPL5019307  | MARK2    | 6.0 | RNAseq |
| NM_014641    | 2535 | 2638 | AMPL26336548 | MDC1     | 6.0 | RNAseq |
| NM_002392    | 1032 | 1134 | AMPL7303511  | MDM2     | 6.0 | RNAseq |
| NM_002393    | 72   | 180  | AMPL8181100  | MDM4     | 6.0 | RNAseq |
| NM_014611    | 2404 | 2513 | AMPL24329619 | MDN1     | 6.0 | RNAseq |
| NM_002396    | 721  | 825  | AMPL11406177 | ME2      | 6.0 | RNAseq |

|              |       |       |              |        |     |        |
|--------------|-------|-------|--------------|--------|-----|--------|
| NM_001014811 | 1838  | 1943  | AMPL1782936  | ME3    | 6.0 | RNAseq |
| NM_004991    | 2834  | 2942  | AMPL29346377 | MECOM  | 6.0 | RNAseq |
| NM_000245    | 1299  | 1402  | AMPL6356343  | MET    | 6.0 | RNAseq |
| NM_020774    | 2712  | 2813  | AMPL37300734 | MIB1   | 6.0 | RNAseq |
| NM_001167617 | 832   | 933   | AMPL6964984  | MLH1   | 6.0 | RNAseq |
| NM_003482    | 16046 | 16151 | AMPL10101127 | MLL2   | 6.0 | RNAseq |
| NM_170606    | 14602 | 14709 | AMPL15606787 | MLL3   | 6.0 | RNAseq |
| NM_001199173 | 1004  | 1113  | AMPL9313754  | MLST8  | 6.0 | RNAseq |
| NM_002421    | 689   | 797   | AMPL8873683  | MMP1   | 6.0 | RNAseq |
| NM_002425    | 1210  | 1310  | AMPL7475257  | MMP10  | 6.0 | RNAseq |
| NM_005940    | 462   | 571   | AMPL29528964 | MMP11  | 6.0 | RNAseq |
| NM_002426    | 431   | 535   | AMPL8177821  | MMP12  | 6.0 | RNAseq |
| NM_002427    | 113   | 221   | AMPL10098952 | MMP13  | 6.0 | RNAseq |
| NM_004995    | 1292  | 1393  | AMPL28126753 | MMP14  | 6.0 | RNAseq |
| NM_002428    | 1277  | 1387  | AMPL10443021 | MMP15  | 6.0 | RNAseq |
| NM_005941    | 1072  | 1181  | AMPL26995318 | MMP16  | 6.0 | RNAseq |
| NM_016155    | 1464  | 1575  | AMPL33652624 | MMP17  | 6.0 | RNAseq |
| NM_002429    | 797   | 900   | AMPL8346069  | MMP19  | 6.0 | RNAseq |
| NM_004530    | 1105  | 1213  | AMPL30209982 | MMP2   | 6.0 | RNAseq |
| NM_147191    | 1226  | 1327  | AMPL34190725 | MMP21  | 6.0 | RNAseq |
| NM_006690    | 356   | 462   | AMPL13038272 | MMP24  | 6.0 | RNAseq |
| NM_022468    | 988   | 1094  | AMPL36519971 | MMP25  | 6.0 | RNAseq |
| NM_021801    | 530   | 635   | AMPL35772412 | MMP26  | 6.0 | RNAseq |
| NM_022122    | 434   | 537   | AMPL36954445 | MMP27  | 6.0 | RNAseq |
| NM_024302    | 431   | 536   | AMPL37037907 | MMP28  | 6.0 | RNAseq |
| NM_002422    | 1107  | 1210  | AMPL8346216  | MMP3   | 6.0 | RNAseq |
| NM_002423    | 516   | 619   | AMPL11759516 | MMP7   | 6.0 | RNAseq |
| NM_004994    | 1174  | 1283  | AMPL27989111 | MMP9   | 6.0 | RNAseq |
| NM_005373    | 835   | 945   | AMPL28730730 | MPL    | 6.0 | RNAseq |
| NM_000251    | 1119  | 1223  | AMPL4542401  | MSH2   | 6.0 | RNAseq |
| NM_000179    | 3311  | 3416  | AMPL4246748  | MSH6   | 6.0 | RNAseq |
| NM_005957    | 976   | 1084  | AMPL29530306 | MTHFR  | 6.0 | RNAseq |
| NM_004958    | 6236  | 6338  | AMPL27877510 | MTOR   | 6.0 | RNAseq |
| NM_024690    | 43411 | 43518 | AMPL15019677 | MUC16  | 6.0 | RNAseq |
| NM_002457    | 5450  | 5557  | AMPL8871912  | MUC2   | 6.0 | RNAseq |
| NM_018406    | 14139 | 14247 | AMPL31213936 | MUC4   | 6.0 | RNAseq |
| NM_015057    | 4948  | 5054  | AMPL24379913 | MYCBP2 | 6.0 | RNAseq |
| NM_006540    | 4183  | 4291  | AMPL13044799 | NCOA2  | 6.0 | RNAseq |
| NM_006311    | 2322  | 2419  | AMPL30027306 | NCOR1  | 6.0 | RNAseq |

|              |       |       |              |         |     |        |
|--------------|-------|-------|--------------|---------|-----|--------|
| NM_006312    | 7037  | 7146  | AMPL27417266 | NCOR2   | 6.0 | RNAseq |
| NM_015331    | 498   | 607   | AMPL26118170 | NCSTN   | 6.0 | RNAseq |
| NM_001164508 | 18031 | 18138 | AMPL7999843  | NEB     | 6.0 | RNAseq |
| NM_001042492 | 1514  | 1612  | AMPL3996151  | NF1     | 6.0 | RNAseq |
| NM_000268    | 1115  | 1214  | AMPL6592465  | NF2     | 6.0 | RNAseq |
| NM_003998    | 2345  | 2452  | AMPL27136949 | NFKB1   | 6.0 | RNAseq |
| NM_001077494 | 965   | 1065  | AMPL6185903  | NFKB2   | 6.0 | RNAseq |
| NM_017617    | 5930  | 6040  | AMPL33493342 | NOTCH1  | 6.0 | RNAseq |
| NM_024408    | 1520  | 1630  | AMPL35823019 | NOTCH2  | 6.0 | RNAseq |
| NM_000435    | 738   | 847   | AMPL3430435  | NOTCH3  | 6.0 | RNAseq |
| NM_004557    | 2358  | 2467  | AMPL27569053 | NOTCH4  | 6.0 | RNAseq |
| NM_002520    | 576   | 681   | AMPL8187368  | NPM1    | 6.0 | RNAseq |
| NM_002524    | 303   | 407   | AMPL11267387 | NRAS    | 6.0 | RNAseq |
| NM_003489    | 93    | 189   | AMPL11392168 | NRIP1   | 6.0 | RNAseq |
| NM_004801    | 4960  | 5059  | AMPL29358066 | NRXN1   | 6.0 | RNAseq |
| NM_015080    | 4577  | 4680  | AMPL25474143 | NRXN2   | 6.0 | RNAseq |
| NM_004796    | 3216  | 3319  | AMPL28007436 | NRXN3   | 6.0 | RNAseq |
| NM_001012338 | 1027  | 1137  | AMPL2580213  | NTRK3   | 6.0 | RNAseq |
| NM_001005743 | 957   | 1059  | AMPL936056   | NUMB    | 6.0 | RNAseq |
| NM_004756    | 1129  | 1236  | AMPL27317997 | NUMBL   | 6.0 | RNAseq |
| NM_001098623 | 1855  | 1965  | AMPL2976103  | OBSCN   | 6.0 | RNAseq |
| NM_002545    | 504   | 605   | AMPL10048041 | OPCML   | 6.0 | RNAseq |
| NM_024675    | 3014  | 3116  | AMPL14193671 | PALB2   | 6.0 | RNAseq |
| NM_001618    | 1871  | 1978  | AMPL7740822  | PARP1   | 6.0 | RNAseq |
| NM_018313    | 271   | 377   | AMPL32182407 | PBRM1   | 6.0 | RNAseq |
| NM_001142763 | 1917  | 2019  | AMPL6180976  | PCDH15  | 6.0 | RNAseq |
| NM_033026    | 2109  | 2217  | AMPL15716280 | PCLO    | 6.0 | RNAseq |
| NM_002607    | 1201  | 1307  | AMPL9054458  | PDGFA   | 6.0 | RNAseq |
| NM_002608    | 1710  | 1816  | AMPL10511493 | PDGFB   | 6.0 | RNAseq |
| NM_006206    | 1195  | 1301  | AMPL27093990 | PDGFRA  | 6.0 | RNAseq |
| NM_002609    | 2793  | 2901  | AMPL6946491  | PDGFRB  | 6.0 | RNAseq |
| NM_002613    | 962   | 1071  | AMPL10512203 | PDPK1   | 6.0 | RNAseq |
| NM_001146184 | 1171  | 1280  | AMPL7379639  | PEG3    | 6.0 | RNAseq |
| NM_006218    | 1278  | 1384  | AMPL27428910 | PIK3CA  | 6.0 | RNAseq |
| NM_181523    | 2248  | 2355  | AMPL15796294 | PIK3R1  | 6.0 | RNAseq |
| NM_005027    | 1903  | 2010  | AMPL29342504 | PIK3R2  | 6.0 | RNAseq |
| NM_003629    | 1036  | 1142  | AMPL6971173  | PIK3R3  | 6.0 | RNAseq |
| NM_000928    | 256   | 361   | AMPL4412977  | PLA2G1B | 6.0 | RNAseq |
| NM_001080954 | 527   | 630   | AMPL1084498  | PLAGL1  | 6.0 | RNAseq |

|              |      |      |              |          |     |        |
|--------------|------|------|--------------|----------|-----|--------|
| NM_016341    | 2421 | 2529 | AMPL30694092 | PLCE1    | 6.0 | RNAseq |
| NM_012401    | 2348 | 2457 | AMPL12107637 | PLXNB2   | 6.0 | RNAseq |
| NM_000535    | 846  | 956  | AMPL2611585  | PMS2     | 6.0 | RNAseq |
| NM_000936    | 298  | 400  | AMPL1809225  | PNLIP    | 6.0 | RNAseq |
| NM_005396    | 206  | 314  | AMPL26905924 | PNLIPRP2 | 6.0 | RNAseq |
| NM_024870    | 2122 | 2231 | AMPL14424417 | PREX2    | 6.0 | RNAseq |
| NM_002740    | 1904 | 2003 | AMPL7637660  | PRKCI    | 6.0 | RNAseq |
| NM_002742    | 2685 | 2791 | AMPL8507412  | PRKD1    | 6.0 | RNAseq |
| NM_002769    | 443  | 546  | AMPL8328647  | PRSS1    | 6.0 | RNAseq |
| NM_000021    | 1212 | 1320 | AMPL14470    | PSEN1    | 6.0 | RNAseq |
| NM_000447    | 54   | 157  | AMPL5186868  | PSEN2    | 6.0 | RNAseq |
| NM_000264    | 542  | 645  | AMPL2735774  | PTCH1    | 6.0 | RNAseq |
| NM_000314    | 1973 | 2078 | AMPL1258705  | PTEN     | 6.0 | RNAseq |
| NM_005607    | 396  | 498  | AMPL27593575 | PTK2     | 6.0 | RNAseq |
| NM_002834    | 1426 | 1533 | AMPL7836151  | PTPN11   | 6.0 | RNAseq |
| NM_133170    | 4341 | 4449 | AMPL17962429 | PTPRT    | 6.0 | RNAseq |
| NM_001080855 | 1495 | 1600 | AMPL5092974  | PXN      | 6.0 | RNAseq |
| NM_020387    | 565  | 673  | AMPL31006624 | RAB25    | 6.0 | RNAseq |
| NM_002875    | 775  | 883  | AMPL10470661 | RAD51    | 6.0 | RNAseq |
| NM_133509    | 504  | 605  | AMPL16253058 | RAD51B   | 6.0 | RNAseq |
| NM_058216    | 184  | 288  | AMPL15676654 | RAD51C   | 6.0 | RNAseq |
| NM_001142571 | 1157 | 1264 | AMPL3899153  | RAD51D   | 6.0 | RNAseq |
| NM_002880    | 584  | 689  | AMPL7972359  | RAF1     | 6.0 | RNAseq |
| NM_006325    | 477  | 581  | AMPL29167139 | RAN      | 6.0 | RNAseq |
| NM_170714    | 880  | 983  | AMPL17627221 | RASSF1   | 6.0 | RNAseq |
| NM_000321    | 2459 | 2560 | AMPL4177352  | RB1      | 6.0 | RNAseq |
| NM_002895    | 956  | 1061 | AMPL7447897  | RBL1     | 6.0 | RNAseq |
| NM_005611    | 1420 | 1528 | AMPL27471829 | RBL2     | 6.0 | RNAseq |
| NM_001204468 | 2818 | 2929 | AMPL8840086  | RBM10    | 6.0 | RNAseq |
| NM_019610    | 280  | 386  | AMPL33877560 | RBMXL1   | 6.0 | RNAseq |
| NM_015874    | 530  | 635  | AMPL33316469 | RBPJ     | 6.0 | RNAseq |
| NM_014276    | 638  | 749  | AMPL25934349 | RBPJL    | 6.0 | RNAseq |
| NM_001199771 | 841  | 951  | AMPL9773680  | RDH5     | 6.0 | RNAseq |
| NM_004260    | 3011 | 3118 | AMPL28074626 | RECQL4   | 6.0 | RNAseq |
| NM_002909    | 393  | 496  | AMPL9367761  | REG1A    | 6.0 | RNAseq |
| NM_020975    | 3083 | 3189 | AMPL35555716 | RET      | 6.0 | RNAseq |
| NM_005614    | 848  | 952  | AMPL29765372 | RHEB     | 6.0 | RNAseq |
| NM_152756    | 511  | 612  | AMPL34230729 | RICTOR   | 6.0 | RNAseq |
| NM_001100117 | 3580 | 3692 | AMPL5481686  | RIMS2    | 6.0 | RNAseq |

|              |       |       |              |          |     |        |
|--------------|-------|-------|--------------|----------|-----|--------|
| NM_020954    | 1902  | 2003  | AMPL35562486 | RNF213   | 6.0 | RNAseq |
| NM_017763    | 1824  | 1931  | AMPL31087747 | RNF43    | 6.0 | RNAseq |
| NM_002941    | 852   | 958   | AMPL8294357  | ROBO1    | 6.0 | RNAseq |
| NM_002942    | 957   | 1066  | AMPL8289722  | ROBO2    | 6.0 | RNAseq |
| NM_002944    | 5968  | 6075  | AMPL8656446  | ROS1     | 6.0 | RNAseq |
| NM_001006665 | 1321  | 1425  | AMPL348625   | RPS6KA1  | 6.0 | RNAseq |
| NM_001006932 | 544   | 651   | AMPL137058   | RPS6KA2  | 6.0 | RNAseq |
| NM_003161    | 1295  | 1401  | AMPL7785472  | RPS6KB1  | 6.0 | RNAseq |
| NM_003952    | 367   | 472   | AMPL28449225 | RPS6KB2  | 6.0 | RNAseq |
| NM_020761    | 4111  | 4215  | AMPL35157367 | RPTOR    | 6.0 | RNAseq |
| NM_001003699 | 1034  | 1141  | AMPL1968710  | RREB1    | 6.0 | RNAseq |
| NM_001033    | 936   | 1042  | AMPL1611364  | RRM1     | 6.0 | RNAseq |
| NM_000540    | 11872 | 11977 | AMPL3225561  | RYR1     | 6.0 | RNAseq |
| NM_001035    | 9945  | 10047 | AMPL1733055  | RYR2     | 6.0 | RNAseq |
| NM_001036    | 1723  | 1828  | AMPL1520839  | RYR3     | 6.0 | RNAseq |
| NM_014363    | 2640  | 2745  | AMPL24834319 | SACS     | 6.0 | RNAseq |
| NM_001159576 | 758   | 863   | AMPL10039407 | SCNN1A   | 6.0 | RNAseq |
| NM_002999    | 471   | 577   | AMPL7301130  | SDC4     | 6.0 | RNAseq |
| NM_001122752 | 387   | 484   | AMPL5662405  | SERPINI1 | 6.0 | RNAseq |
| NM_012433    | 153   | 259   | AMPL12373410 | SF3B1    | 6.0 | RNAseq |
| NM_001040    | 185   | 290   | AMPL3074490  | SHBG     | 6.0 | RNAseq |
| NM_194255    | 1280  | 1388  | AMPL21930828 | SLC19A1  | 6.0 | RNAseq |
| NM_004213    | 162   | 269   | AMPL27356353 | SLC28A1  | 6.0 | RNAseq |
| NM_004212    | 1382  | 1489  | AMPL27258113 | SLC28A2  | 6.0 | RNAseq |
| NM_001199633 | 597   | 704   | AMPL7027115  | SLC28A3  | 6.0 | RNAseq |
| NM_001078176 | 1188  | 1298  | AMPL1105895  | SLC29A1  | 6.0 | RNAseq |
| NM_004787    | 3519  | 3625  | AMPL28261068 | SLIT2    | 6.0 | RNAseq |
| NM_005902    | 1079  | 1187  | AMPL27676678 | SMAD3    | 6.0 | RNAseq |
| NM_005359    | 1745  | 1851  | AMPL29138004 | SMAD4    | 6.0 | RNAseq |
| NM_003072    | 564   | 674   | AMPL7948109  | SMARCA4  | 6.0 | RNAseq |
| NM_003073    | 523   | 631   | AMPL7593839  | SMARCB1  | 6.0 | RNAseq |
| NM_005631    | 1856  | 1959  | AMPL29337409 | SMO      | 6.0 | RNAseq |
| NM_012245    | 303   | 412   | AMPL13062838 | SNW1     | 6.0 | RNAseq |
| NM_014758    | 3119  | 3224  | AMPL26165780 | SNX19    | 6.0 | RNAseq |
| NM_001024465 | 587   | 696   | AMPL1734190  | SOD2     | 6.0 | RNAseq |
| NM_000346    | 986   | 1093  | AMPL5370025  | SOX9     | 6.0 | RNAseq |
| NM_015001    | 271   | 380   | AMPL25046245 | SPEN     | 6.0 | RNAseq |
| NM_003122    | 242   | 344   | AMPL9338361  | SPINK1   | 6.0 | RNAseq |
| NM_198291    | 856   | 962   | AMPL22168733 | SRC      | 6.0 | RNAseq |

|              |       |       |              |         |     |        |
|--------------|-------|-------|--------------|---------|-----|--------|
| NM_001047    | 804   | 904   | AMPL5562052  | SRD5A1  | 6.0 | RNAseq |
| NM_024592    | 803   | 908   | AMPL14248816 | SRD5A3  | 6.0 | RNAseq |
| NM_021908    | 1218  | 1321  | AMPL35771376 | ST7     | 6.0 | RNAseq |
| NM_000349    | 351   | 457   | AMPL4163525  | STAR    | 6.0 | RNAseq |
| NM_007315    | 1887  | 1996  | AMPL12063649 | STAT1   | 6.0 | RNAseq |
| NM_005419    | 973   | 1083  | AMPL27615998 | STAT2   | 6.0 | RNAseq |
| NM_139276    | 1751  | 1856  | AMPL34373921 | STAT3   | 6.0 | RNAseq |
| NM_003152    | 1850  | 1954  | AMPL8257905  | STAT5A  | 6.0 | RNAseq |
| NM_012448    | 1887  | 1989  | AMPL12105990 | STAT5B  | 6.0 | RNAseq |
| NM_000455    | 1309  | 1416  | AMPL5683663  | STK11   | 6.0 | RNAseq |
| NM_182961    | 19512 | 19616 | AMPL20997674 | SYNE1   | 6.0 | RNAseq |
| NM_001163278 | 3297  | 3405  | AMPL6770728  | TENM1   | 6.0 | RNAseq |
| NM_001122679 | 7304  | 7408  | AMPL1166021  | TENM2   | 6.0 | RNAseq |
| NM_001080477 | 3577  | 3688  | AMPL1805634  | TENM3   | 6.0 | RNAseq |
| NM_198253    | 2498  | 2605  | AMPL20680601 | TERT    | 6.0 | RNAseq |
| NM_000660    | 1368  | 1474  | AMPL4304112  | TGFB1   | 6.0 | RNAseq |
| NM_004612    | 1024  | 1131  | AMPL28513658 | TGFBR1  | 6.0 | RNAseq |
| NM_001024847 | 1806  | 1912  | AMPL686015   | TGFBR2  | 6.0 | RNAseq |
| NM_001130475 | 354   | 449   | AMPL6206261  | THAP5   | 6.0 | RNAseq |
| NM_001080427 | 3087  | 3194  | AMPL1658138  | THSD7B  | 6.0 | RNAseq |
| NM_001010938 | 1304  | 1410  | AMPL119735   | TNK2    | 6.0 | RNAseq |
| NM_003286    | 890   | 997   | AMPL7567651  | TOP1    | 6.0 | RNAseq |
| NM_000546    | 1249  | 1356  | AMPL3223250  | TP53    | 6.0 | RNAseq |
| NM_001141980 | 3695  | 3802  | AMPL4088949  | TP53BP1 | 6.0 | RNAseq |
| NM_001031685 | 1080  | 1184  | AMPL1671575  | TP53BP2 | 6.0 | RNAseq |
| NM_000368    | 663   | 766   | AMPL2671559  | TSC1    | 6.0 | RNAseq |
| NM_000548    | 1161  | 1266  | AMPL3612152  | TSC2    | 6.0 | RNAseq |
| NM_003318    | 1487  | 1591  | AMPL10426758 | TTK     | 6.0 | RNAseq |
| NM_133378    | 4985  | 5092  | AMPL17955240 | TTN     | 6.0 | RNAseq |
| NM_020245    | 1678  | 1786  | AMPL32912710 | TULP4   | 6.0 | RNAseq |
| NM_001071    | 673   | 780   | AMPL4563892  | TYMS    | 6.0 | RNAseq |
| NM_006758    | 361   | 453   | AMPL12030759 | U2AF1   | 6.0 | RNAseq |
| NM_000463    | 800   | 899   | AMPL4494755  | UGT1A1  | 6.0 | RNAseq |
| NM_001076    | 1422  | 1530  | AMPL1839870  | UGT2B15 | 6.0 | RNAseq |
| NM_001077    | 740   | 837   | AMPL4973457  | UGT2B17 | 6.0 | RNAseq |
| NM_001074    | 1338  | 1442  | AMPL2443325  | UGT2B7  | 6.0 | RNAseq |
| NM_001171623 | 1280  | 1389  | AMPL8112284  | VEGFA   | 6.0 | RNAseq |
| NM_003377    | 862   | 953   | AMPL11734697 | VEGFB   | 6.0 | RNAseq |
| NM_000551    | 453   | 559   | AMPL6148676  | VHL     | 6.0 | RNAseq |



|              |      |      |              |        |     |        |
|--------------|------|------|--------------|--------|-----|--------|
| NM_020945    | 7773 | 7882 | AMPL34915315 | WDFY4  | 6.0 | RNAseq |
| NM_006103    | 391  | 500  | AMPL26931127 | WFDC2  | 6.0 | RNAseq |
| NM_016373    | 558  | 664  | AMPL31669480 | WVOX   | 6.0 | RNAseq |
| NM_006297    | 1115 | 1223 | AMPL27997545 | XRCC1  | 6.0 | RNAseq |
| NM_005431    | 146  | 251  | AMPL28183476 | XRCC2  | 6.0 | RNAseq |
| NM_001100118 | 298  | 395  | AMPL3903442  | XRCC3  | 6.0 | RNAseq |
| NM_024721    | 3974 | 4079 | AMPL14007565 | ZFHX4  | 6.0 | RNAseq |
| NM_014717    | 2415 | 2524 | AMPL26170911 | ZNF536 | 6.0 | RNAseq |

**eTable 3. Univariable and multivariable logistic regression analyzing the association of preoperative demographic and clinical factors with favorable PR (score 0 or 1) showing that MMP-7 expression profile on FNA specimens prior to neoadjuvant therapy is an independent predictor of PR.**

|                                         | Univariable Logistic Regression |                |              | Multivariable Logistic Regression |                 |              |
|-----------------------------------------|---------------------------------|----------------|--------------|-----------------------------------|-----------------|--------------|
|                                         | OR                              | 95% CI         | <i>P</i>     | OR                                | 95% CI          | <i>P</i>     |
| Age ≥ 65 (years)                        | 0.88                            | [0.36 - 2.13]  | 0.77         |                                   |                 |              |
| Sex (Male)                              | 0.99                            | [0.41 - 2.41]  | 0.99         |                                   |                 |              |
| Race (White)                            | 1.43                            | [0.35 - 5.81]  | 0.61         |                                   |                 |              |
| Type of Neoadjuvant (5FU-based)         | 0.92                            | [0.31 - 2.65]  | 0.88         |                                   |                 |              |
| Chemo-Radiation (vs. Chemotherapy only) | 4.82                            | [1.54 - 15.06] | <b>0.007</b> | 7.42                              | [1.55 - 35.38]  | <b>0.01</b>  |
| Baseline Ca19-9 ≥200                    | 0.90                            | [0.37 - 2.16]  | 0.81         | 1.36                              | [0.37 - 4.96]   | 0.63         |
| Size (largest dimension) ≥ 3.5 cm       | 0.65                            | [0.26 - 1.58]  | 0.35         | 0.36                              | [0.10 - 1.32]   | 0.13         |
| Interval decrease in size               | 1.21                            | [0.40 - 3.63]  | 0.73         |                                   |                 |              |
| Grade (Poor)                            | 0.86                            | [0.33 - 2.25]  | 0.76         | 0.85                              | [0.21 - 3.31]   | 0.81         |
| MMP-7 (Negative)                        | 21.25                           | [6.19 - 72.95] | <b>0.001</b> | 32.85                             | [7.22 - 149.41] | <b>0.001</b> |
| Resectability Status                    |                                 |                | 0.21         |                                   |                 |              |
| Resectable                              | 1 [Ref]                         |                |              |                                   |                 |              |
| Borderline resectable                   | 0.83                            | [0.28 - 2.47]  | 0.74         |                                   |                 |              |
| Locally advanced                        | 0.39                            | [1.12 - 1.19]  | 0.10         |                                   |                 |              |

OR, Odds ratio; CI, Confidence Interval.

Neoadjuvant chemoradiation, baseline of CA 19-9 ≥ 200, tumor size ≥ 3.5 cm, poorly differentiated tumor grade, and MMP-7 status were applied for multivariable logistic regression analysis.

**eTable 4. Demographics and tumor characteristics of FFPE surgical specimens in chemo-naïve cohort (n=60).**

| Variables, N (%)                               | MMP-7 Negative<br>(N = 28) | MMP-7 Positive<br>(N = 32) | P            |
|------------------------------------------------|----------------------------|----------------------------|--------------|
| Age (years) Median (IQR)                       | 71 (60.2, 78.7)            | 71 (62.2, 76.7)            | 0.56         |
| Sex (Male)                                     | 16 (57.1)                  | 7 (21.9)                   | <b>0.008</b> |
| Race (White)                                   | 23 (82.1)                  | 26 (81.3)                  | 0.99         |
| Ca19-9 Median (IQR)                            | 96.1 (30.7, 277.1)         | 107 (35.2, 338.5)          | 0.79         |
| Size (largest dimension in cm)<br>Median (IQR) | 3.1 (2.5, 4.8)             | 3.5 (2.5, 4.4)             | 0.79         |
| Tumor location (Head/neck)                     | 21 (75)                    | 21 (65.6)                  | 0.57         |
| pT-stage                                       |                            |                            | 0.46         |
| pT1                                            | 1 (3.6)                    | 2 (6.3)                    |              |
| pT2                                            | 14 (50)                    | 11 (34.4)                  |              |
| pT3                                            | 13 (46.4)                  | 19 (59.4)                  |              |
| pN-stage                                       |                            |                            | 0.99         |
| pN0                                            | 7 (25)                     | 8 (25)                     |              |
| pN1                                            | 21 (75)                    | 24 (75)                    |              |
| Grade of differentiation                       |                            |                            | 0.24         |
| Well                                           | 2 (7.1)                    | 0 (0)                      |              |
| Moderate                                       | 14 (50)                    | 20 (62.5)                  |              |
| Poor                                           | 12 (42.9)                  | 12 (37.5)                  |              |
| Lymphovascular Invasion                        | 17 (60.7)                  | 23 (71.9)                  | 0.41         |
| Perineural Invasion                            | 25 (89.3)                  | 29 (90.6)                  | 0.99         |
| Margin Class (R0)                              | 23 (82.1)                  | 27 (84.4)                  | 0.99         |
| Adjuvant Chemotherapy                          | 19 (70.4)                  | 26 (83.8)                  | 0.34         |

IQR, Interquartile range.

**eTable 5. Area Under Curve (AUC) obtained from ROC curves (Figure S2) based on multivariable regression modelling with and without MMP-7 after stratification by resectability status at the time of diagnosis showing role of MMP-7 protein expression profile on FNA specimens in predicting favorable PR.**

|                       | Without MMP-7         |                 |           |          | With MMP-7            |                 |           |          |
|-----------------------|-----------------------|-----------------|-----------|----------|-----------------------|-----------------|-----------|----------|
|                       | AUC [95% CI]          | Hosmer-Lemeshow |           |          | AUC [95% CI]          | Hosmer-Lemeshow |           |          |
|                       |                       | Chi-Square      | <i>df</i> | <i>P</i> |                       | Chi-Square      | <i>df</i> | <i>P</i> |
| Resectable            | 0.688 [0.539 - 0.828] | 8.14            | 6         | 0.419    | 0.902 [0.812 - 0.991] | 6.37            | 7         | 0.606    |
| Borderline resectable | 0.800 [0.631 - 0.969] | 8.53            | 7         | 0.287    | 0.881 [0.750 - 0.992] | 5.45            | 6         | 0.604    |
| Locally advanced      | 0.682 [0.470 - 0.895] | 2.01            | 7         | 0.959    | 0.927 [0.833 - 0.998] | 3.43            | 7         | 0.842    |

CI, Confidence Interval

**eTable 6. Univariable and multivariable Cox regression (backward-entry method) on FFPE surgical specimens in exploratory (chemo-naïve) cohort.**

|                         | Recurrence-Free Survival (RFS) |               |              |                              |               |              | Overall Survival (OS)      |               |              |                              |               |              |
|-------------------------|--------------------------------|---------------|--------------|------------------------------|---------------|--------------|----------------------------|---------------|--------------|------------------------------|---------------|--------------|
|                         | Univariable Cox Regression     |               |              | Multivariable Cox Regression |               |              | Univariable Cox Regression |               |              | Multivariable Cox Regression |               |              |
|                         | HR                             | 95% CI        | P            | HR                           | 95% CI        | P            | HR                         | 95% CI        | P            | HR                           | 95% CI        | P            |
| Age ≥ 65 years          | 1.01                           | [0.97 - 1.02] | 0.92         |                              |               |              | 1.62                       | [0.84 - 3.09] | 0.14         |                              |               |              |
| Sex (Male)              | 0.63                           | [0.34 - 1.17] | 0.15         |                              |               |              | 0.93                       | [0.50 - 1.72] | 0.84         |                              |               |              |
| Race (White)            | 1.26                           | [0.62 - 2.55] | 0.52         |                              |               |              | 1.81                       | [0.76 - 4.29] | 0.17         |                              |               |              |
| Baseline Ca19-9 ≥200    | 1.61                           | [0.87 - 2.95] | 0.12         |                              |               |              | 1.26                       | [0.68 - 2.31] | 0.46         |                              |               |              |
| Grade (Poor)            | 2.18                           | [1.20 - 3.97] | <b>0.01</b>  |                              |               |              | 2.16                       | [1.19 - 3.93] | <b>0.01</b>  |                              |               |              |
| T-stage ≥ T3            | 2.26                           | [1.22 - 4.18] | <b>0.009</b> |                              |               |              | 2.88                       | [1.52 - 5.47] | <b>0.001</b> |                              |               |              |
| N-stage ≥ N1            | 1.12                           | [0.58 - 2.19] | 0.72         |                              |               |              | 2.29                       | [1.09 - 4.80] | <b>0.03</b>  | 3.20                         | [1.43 - 7.42] | <b>0.005</b> |
| Lymphovascular Invasion | 1.62                           | [0.86 - 3.04] | 0.13         |                              |               |              | 1.86                       | [0.96 - 3.63] | 0.07         |                              |               |              |
| Perineural Invasion     | 2.07                           | [0.72 - 5.91] | 0.17         |                              |               |              | 2.24                       | [0.69 - 7.26] | 0.18         |                              |               |              |
| Margin Class (R0)       | 0.97                           | [0.41 - 2.31] | 0.98         |                              |               |              | 0.71                       | [0.32 - 1.52] | 0.38         |                              |               |              |
| MMP-7 (Negative)        | 0.35                           | [0.18 - 0.68] | <b>0.002</b> | 0.23                         | [0.11 - 0.49] | <b>0.001</b> | 0.53                       | [0.28 - 0.79] | <b>0.03</b>  | 0.44                         | [0.23 - 0.85] | <b>0.02</b>  |
| Adjuvant Chemotherapy   | 0.43                           | [0.20 - 0.91] | <b>0.03</b>  | 0.28                         | [0.11 - 0.70] | <b>0.07</b>  | 0.27                       | [0.13 - 0.53] | <b>0.001</b> | 0.19                         | [0.09 - 0.42] | <b>0.001</b> |

HR, hazard ratio; CI, confidence interval.

Poorly differentiated tumor grade, T-stage ≥ T3, N-stage ≥ N1, MMP-7 status, and adjuvant chemotherapy were applied multivariable Cox regression analysis (backward-entry method).

**eFigure 1. IHC staining of tissue biopsy prior to neoadjuvant therapy (validation cohort) representing negative (A) and positive (B) MMP-7 protein expression; IHC staining of primary tumor surgical specimens from chemo-naïve cohort (exploratory cohort) showing negative (C) and positive (D) MMP-7 protein expression.**

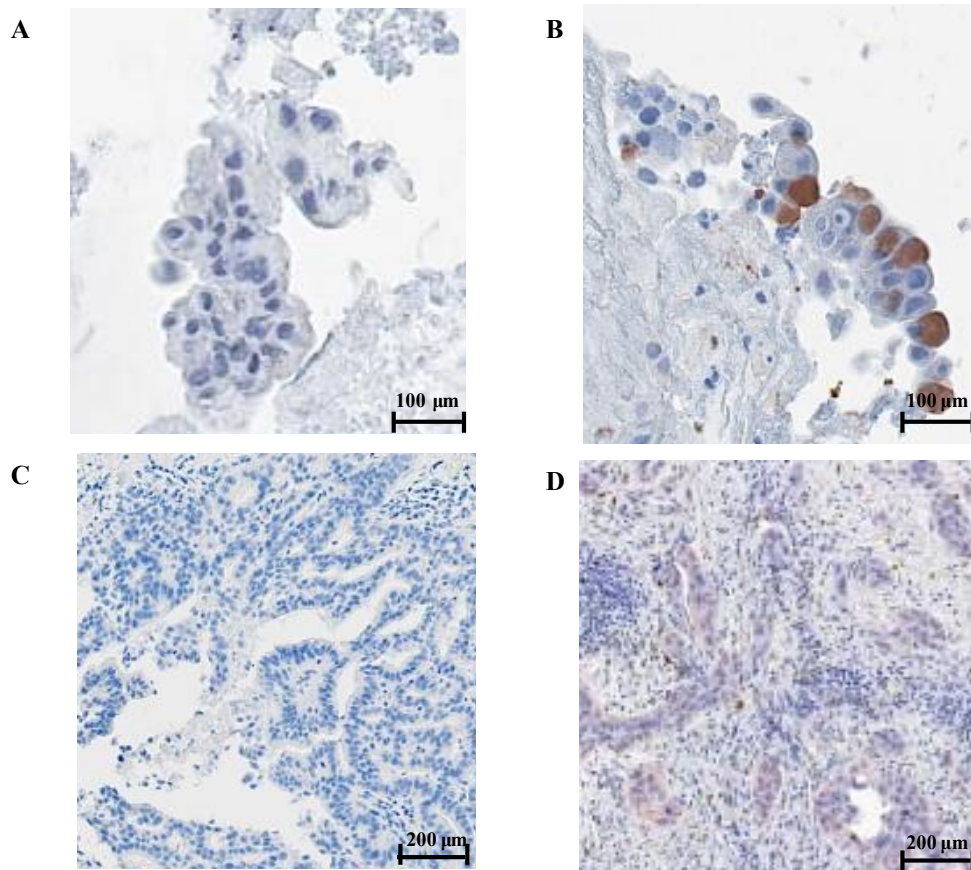

**eFigure 2. ROC curves based on multivariable regression modelling with and without MMP-7 after stratification by resectability status at the time of diagnosis showing role of MMP-7 protein expression profile on FNA specimens in predicting favorable PR.**

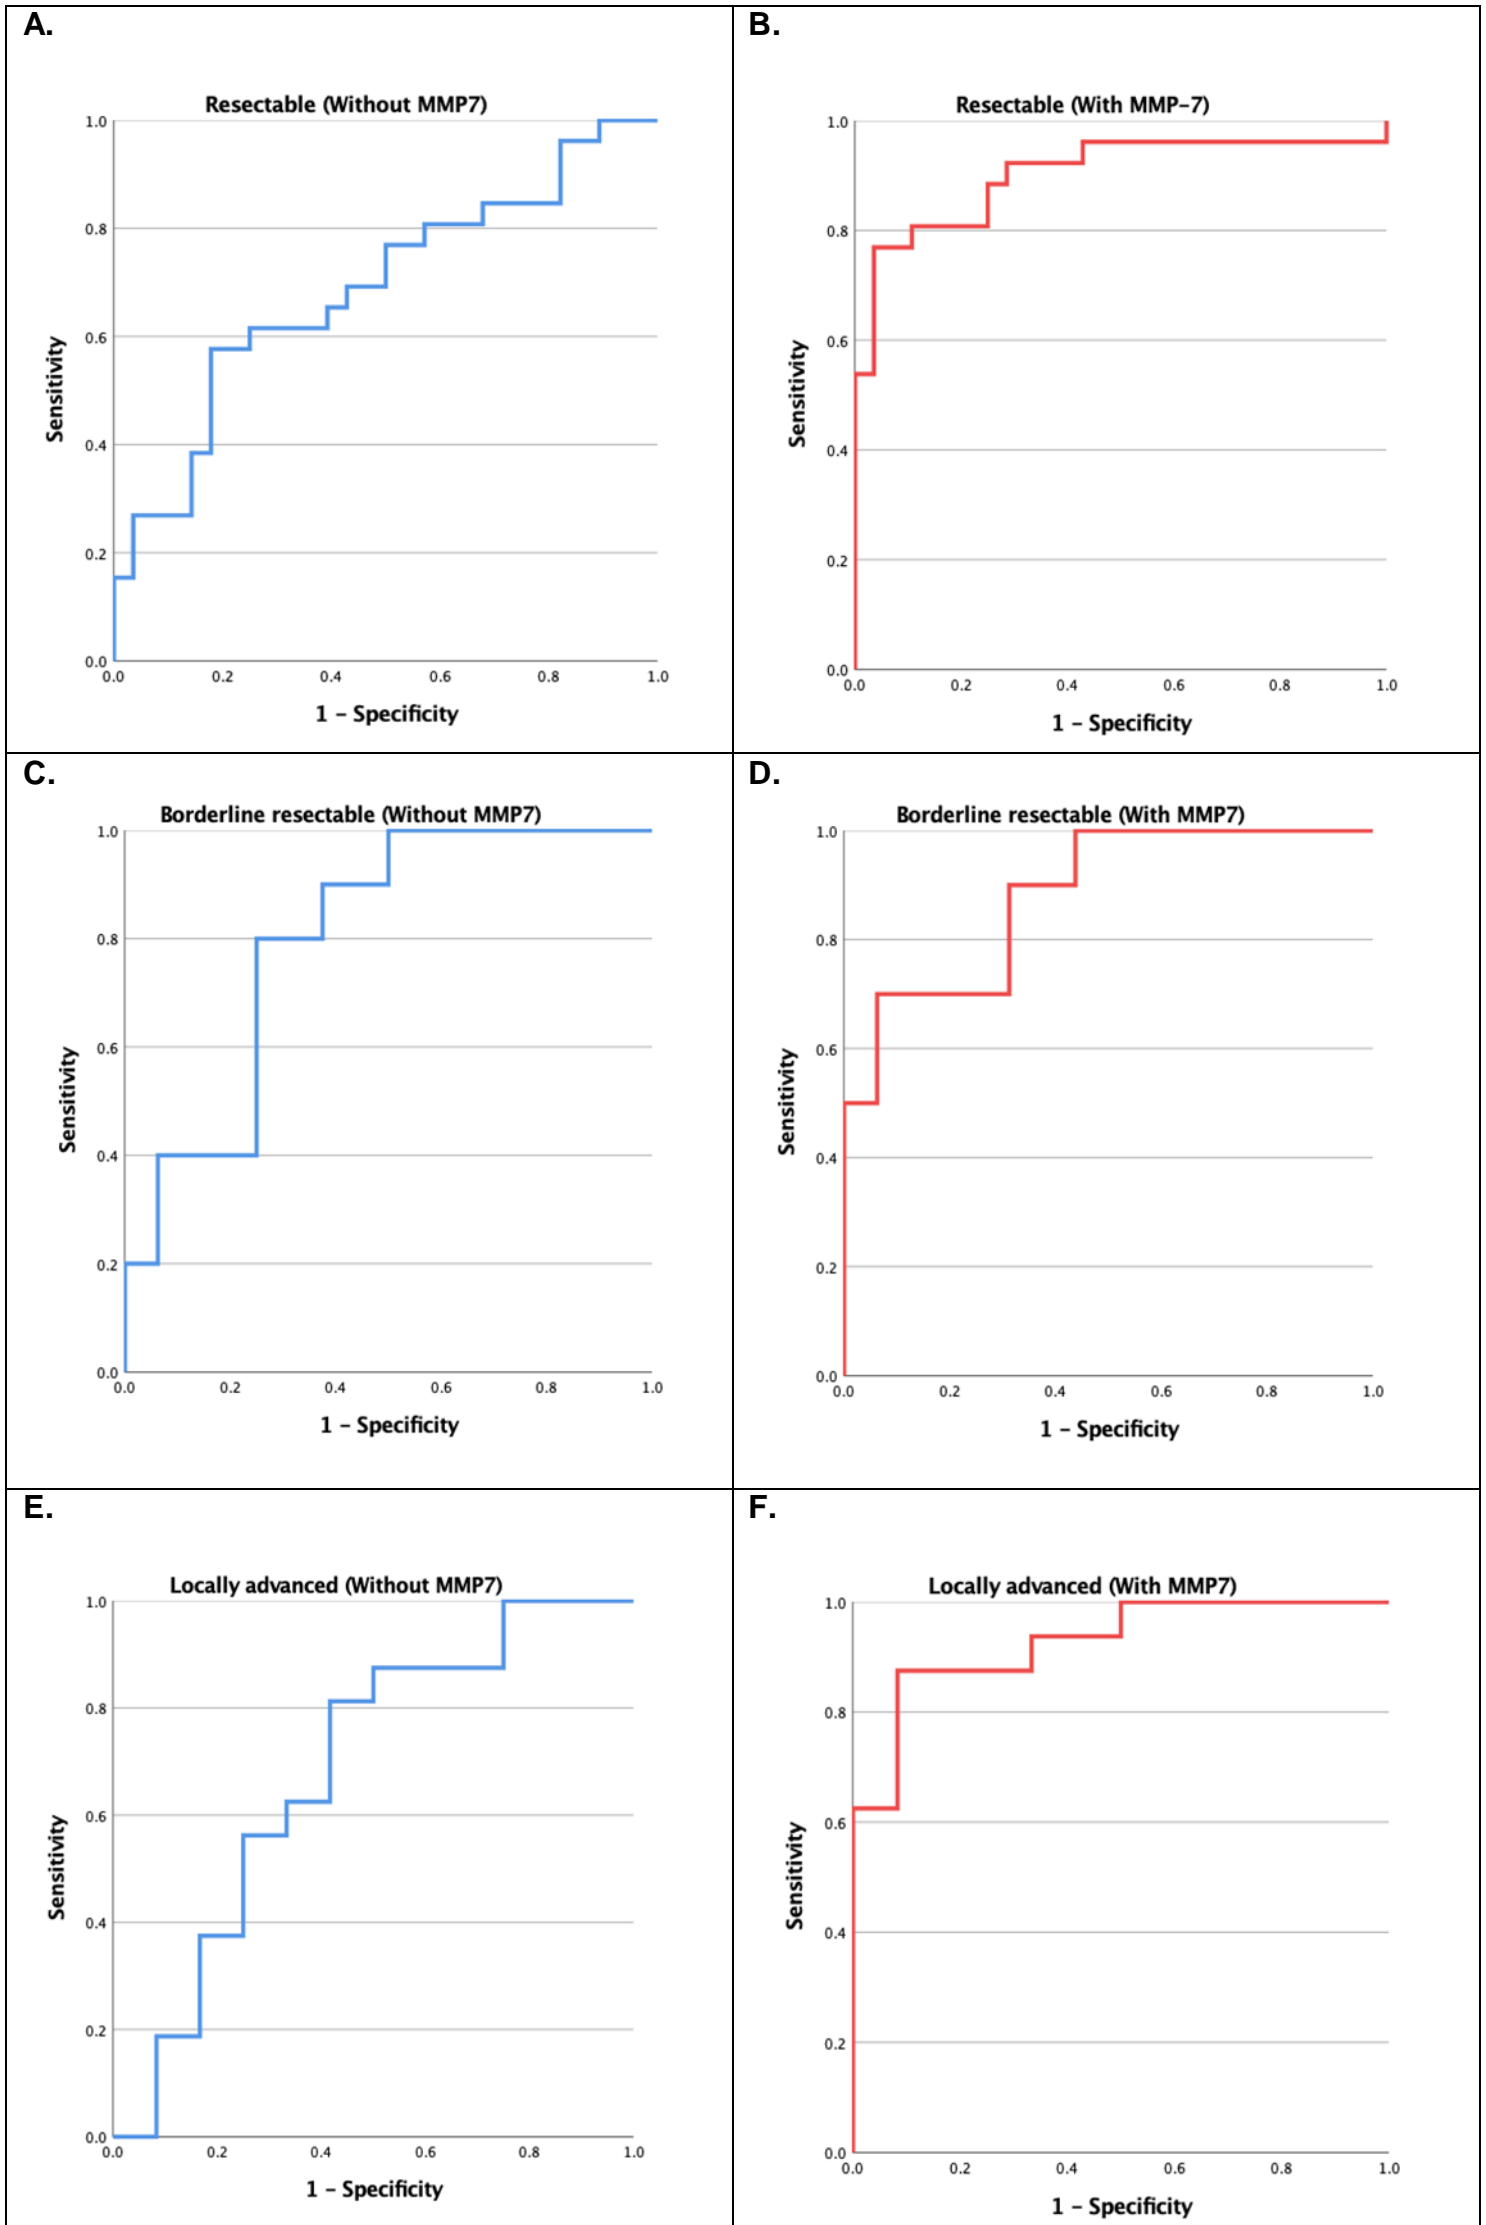

**eFigure 3. Kaplan-Meier Overall Survival and Recurrence-Free Survival Curves comparing MMP-7 positive and negative expression in FNA specimens from cohort undergoing neoadjuvant therapy (A, B) and FFPE surgical specimens from chemo-naïve cohort (C, D).**

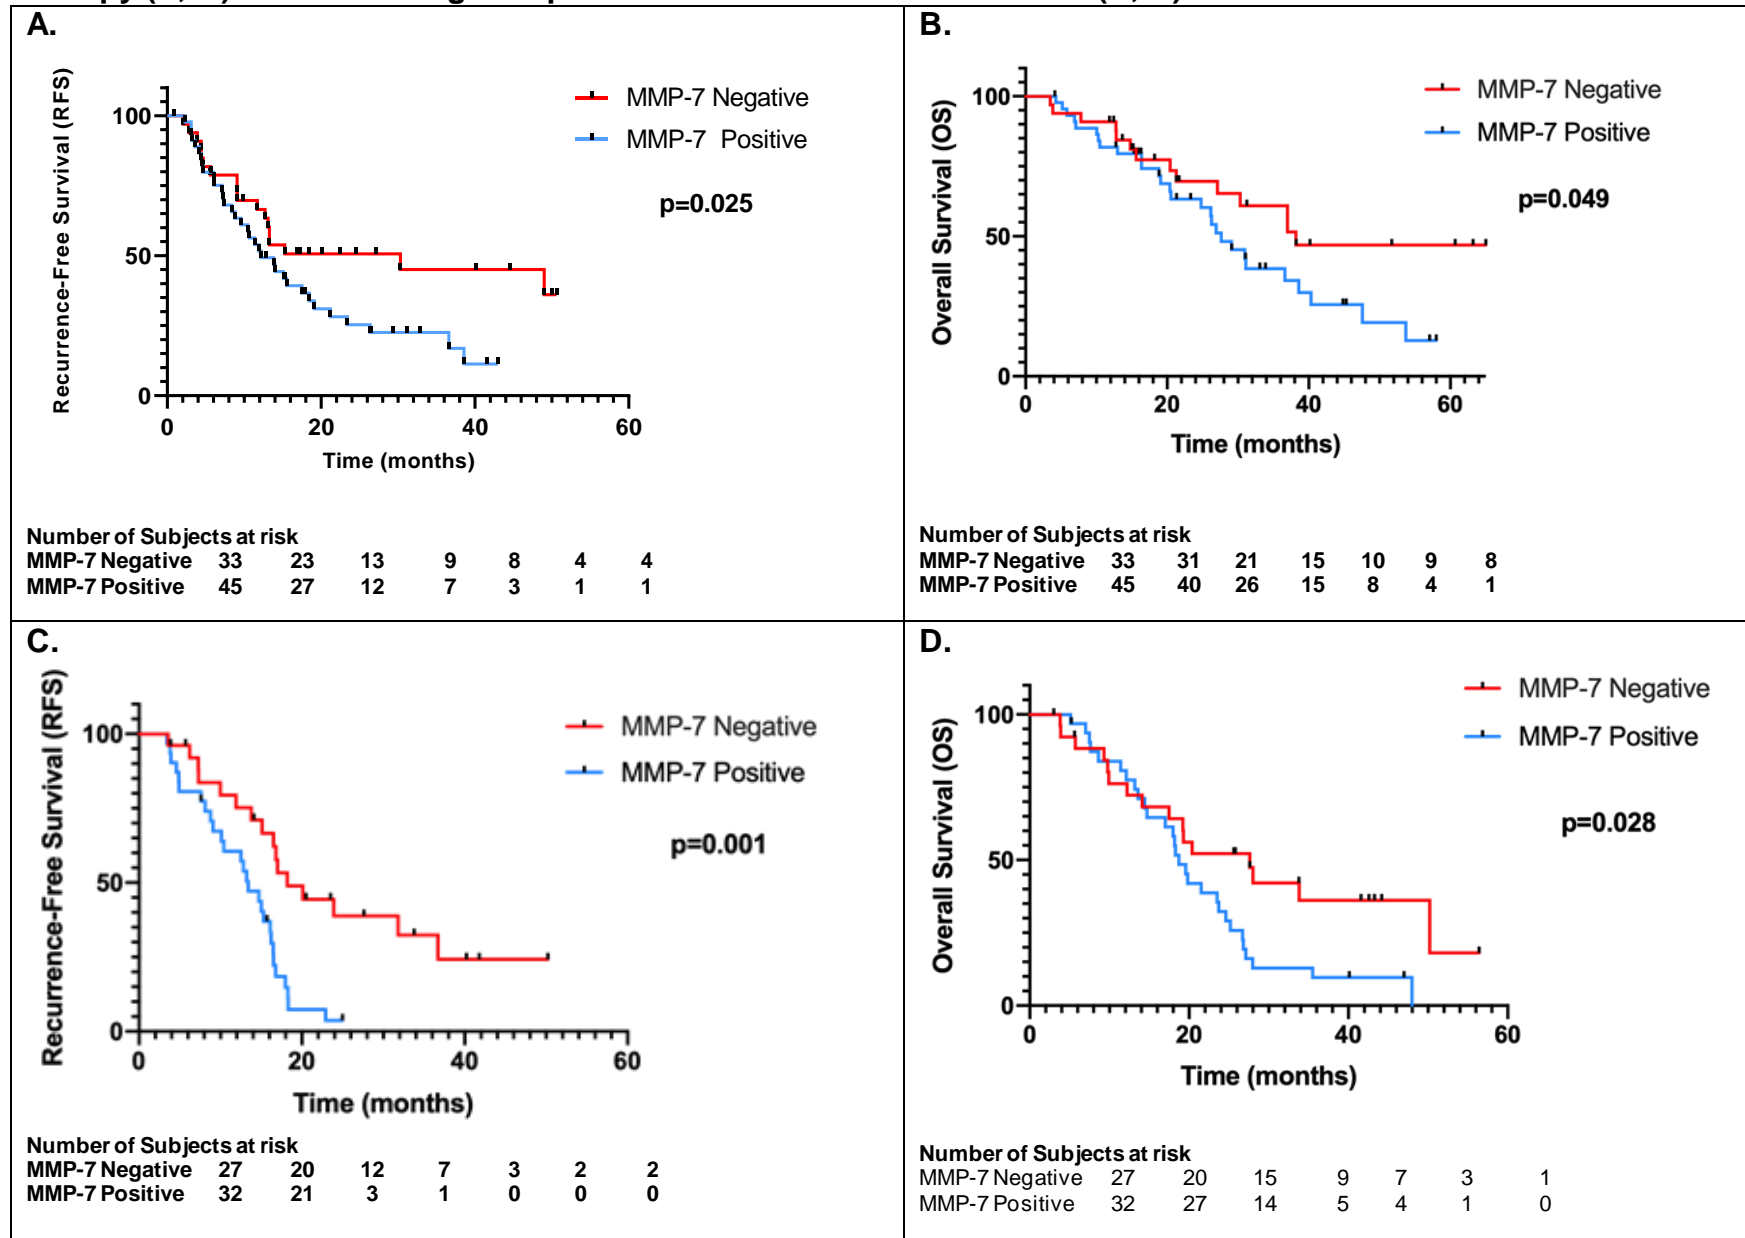

Supplement: jamasurg-e221362-s001.pdf [file jamasurg-e221362-s001.pdf]
